# Supplementary material
Source: PubMed Central journal article supplement (PMC8429171)
Supplement: NIHMS1731758-supplement-1731758_Supp_Tab2.pdf [file NIHMS1731758-supplement-1731758_Supp_Tab2.pdf]

| Category         | Term                                                              |
|------------------|-------------------------------------------------------------------|
| GOTERM_BP_DIRECT | GO:0055114~oxidation-reduction process                            |
| GOTERM_BP_DIRECT | GO:0006730~one-carbon metabolic process                           |
| GOTERM_BP_DIRECT | GO:0005975~carbohydrate metabolic process                         |
| GOTERM_BP_DIRECT | GO:0006635~fatty acid beta-oxidation                              |
| GOTERM_BP_DIRECT | GO:0006189~'de novo' IMP biosynthetic process                     |
| GOTERM_BP_DIRECT | GO:0033539~fatty acid beta-oxidation using acyl-CoA dehydrogenase |
| GOTERM_BP_DIRECT | GO:0006098~pentose-phosphate shunt                                |
| GOTERM_BP_DIRECT | GO:0055088~lipid homeostasis                                      |
| GOTERM_BP_DIRECT | GO:0035999~tetrahydrofolate interconversion                       |
| GOTERM_BP_DIRECT | GO:0055085~transmembrane transport                                |
| GOTERM_BP_DIRECT | GO:0006164~purine nucleotide biosynthetic process                 |
| GOTERM_BP_DIRECT | GO:0008152~metabolic process                                      |
| GOTERM_BP_DIRECT | GO:0006090~pyruvate metabolic process                             |
| GOTERM_BP_DIRECT | GO:0006006~glucose metabolic process                              |
| GOTERM_BP_DIRECT | GO:0006552~leucine catabolic process                              |
| GOTERM_BP_DIRECT | GO:0009083~branched-chain amino acid catabolic process            |
| GOTERM_BP_DIRECT | GO:0006574~valine catabolic process                               |
| GOTERM_BP_DIRECT | GO:0006568~tryptophan metabolic process                           |
| GOTERM_BP_DIRECT | GO:0046323~glucose import                                         |
| GOTERM_BP_DIRECT | GO:0035428~hexose transmembrane transport                         |
| GOTERM_BP_DIRECT | GO:0006551~leucine metabolic process                              |
| GOTERM_BP_DIRECT | GO:0015718~monocarboxylic acid transport                          |
| GOTERM_BP_DIRECT | GO:0009396~folic acid-containing compound biosynthetic process    |
| GOTERM_BP_DIRECT | GO:0006567~threonine catabolic process                            |
| GOTERM_BP_DIRECT | GO:0045454~cell redox homeostasis                                 |
| GOTERM_BP_DIRECT | GO:0006206~pyrimidine nucleobase metabolic process                |
| GOTERM_BP_DIRECT | GO:0001561~fatty acid alpha-oxidation                             |
| GOTERM_BP_DIRECT | GO:0030431~sleep                                                  |
| GOTERM_BP_DIRECT | GO:0006520~cellular amino acid metabolic process                  |
| GOTERM_BP_DIRECT | GO:0006032~chitin catabolic process                               |
| GOTERM_BP_DIRECT | GO:0033499~galactose catabolic process via UDP-galactose          |
| GOTERM_BP_DIRECT | GO:0019318~hexose metabolic process                               |
| GOTERM_BP_DIRECT | GO:0006096~glycolytic process                                     |

| Count | %          | PValue     |
|-------|------------|------------|
| 41    | 19.1588785 | 1.92E-18   |
| 7     | 3.27102804 | 1.38E-06   |
| 12    | 5.60747664 | 4.74E-06   |
| 7     | 3.27102804 | 1.47E-05   |
| 4     | 1.86915888 | 1.31E-04   |
| 5     | 2.3364486  | 1.49E-04   |
| 4     | 1.86915888 | 2.26E-04   |
| 6     | 2.80373832 | 2.72E-04   |
| 3     | 1.40186916 | 0.00107342 |
| 14    | 6.54205607 | 0.00297479 |
| 3     | 1.40186916 | 0.00516756 |
| 8     | 3.73831776 | 0.01959286 |
| 3     | 1.40186916 | 0.02461484 |
| 3     | 1.40186916 | 0.03648275 |
| 2     | 0.93457944 | 0.03781367 |
| 2     | 0.93457944 | 0.03781367 |
| 2     | 0.93457944 | 0.03781367 |
| 2     | 0.93457944 | 0.03781367 |
| 3     | 1.40186916 | 0.05497774 |
| 3     | 1.40186916 | 0.05497774 |
| 2     | 0.93457944 | 0.05618379 |
| 2     | 0.93457944 | 0.05618379 |
| 2     | 0.93457944 | 0.05618379 |
| 2     | 0.93457944 | 0.05618379 |
| 4     | 1.86915888 | 0.07320319 |
| 2     | 0.93457944 | 0.07420511 |
| 2     | 0.93457944 | 0.07420511 |
| 6     | 2.80373832 | 0.07945898 |
| 3     | 1.40186916 | 0.08164158 |
| 3     | 1.40186916 | 0.08164158 |
| 2     | 0.93457944 | 0.09188419 |
| 2     | 0.93457944 | 0.09188419 |
| 3     | 1.40186916 | 0.09321852 |

## Genes

FBGN0037057, FBGN0032945, FBGN0012036, FBGN0086450, FBGN0002719, FBGN0036157, FBGN0036  
FBGN0010222, FBGN0032945, FBGN0014455, FBGN0020385, FBGN0037788, FBGN0036157, FBGN0005  
FBGN0010222, FBGN0023477, FBGN0035484, FBGN0028540, FBGN0000057, FBGN0030239, FBGN0027  
FBGN0034628, FBGN0038326, FBGN0040064, FBGN0040349, FBGN0032161, FBGN0029969, FBGN0031  
FBGN0000052, FBGN0000053, FBGN0020513, FBGN0038467  
FBGN0034628, FBGN0036824, FBGN0031824, FBGN0031813, FBGN0035911  
FBGN0023477, FBGN0004057, FBGN0004654, FBGN0030239  
FBGN0036449, FBGN0034628, FBGN0036824, FBGN0031824, FBGN0031813, FBGN0035911  
FBGN0029823, FBGN0020385, FBGN0036157  
FBGN0010241, FBGN0259834, FBGN0023549, FBGN0033913, FBGN0051793, FBGN0037239, FBGN0034  
FBGN0000052, FBGN0020385, FBGN0039241  
FBGN0038083, FBGN0040064, FBGN0040256, FBGN0037607, FBGN0032161, FBGN0030612, FBGN0024  
FBGN0012036, FBGN0027580, FBGN0029969  
FBGN0043783, FBGN0004057, FBGN0035679  
FBGN0042083, FBGN0035911  
FBGN0038326, FBGN0034390  
FBGN0038326, FBGN0034390  
FBGN0003308, FBGN0031824  
FBGN0034045, FBGN0036316, FBGN0029932  
FBGN0034045, FBGN0036316, FBGN0029932  
FBGN0039877, FBGN0042083  
FBGN0023549, FBGN0033913  
FBGN0010222, FBGN0020385  
FBGN0036208, FBGN0039094  
FBGN0033520, FBGN0033521, FBGN0025628, FBGN0033518  
FBGN0003308, FBGN0023537  
FBGN0034488, FBGN0001248  
FBGN0036449, FBGN0025454, FBGN0002719, FBGN0031914, FBGN0029969, FBGN0024289  
FBGN0036208, FBGN0034390, FBGN0039094  
FBGN0020416, FBGN0052499, FBGN0260653  
FBGN0043783, FBGN0035679  
FBGN0043783, FBGN0035679  
FBGN0039827, FBGN0001187, FBGN0003074

5857, FBGN0031432, FBGN0033518, FBGN0061356, FBGN0037801, FBGN0020385, FBGN002350  
5278  
7341, FBGN0020416, FBGN0025592, FBGN0052499, FBGN0261575, FBGN0260653  
1813

1045, FBGN0028563, FBGN0031012, FBGN0036316, FBGN0004512, FBGN0034394, FBGN002993  
1957, FBGN0035298

07, FBGN0034276, FBGN0033079, FBGN0031824, FBGN0031860, FBGN0017482, FBGN0033520,

02, FBGN0034494

FBGN0036824, FBGN0033521, FBGN0034390, FBGN0041337, FBGN0025628, FBGN0024289, FB

.GN0030966, FBGN0037973, FBGN0036262, FBGN0035911, FBGN0033978, FBGN0051028, FBGN

J0003308, FBGN0010222, FBGN0025454, FBGN0032350, FBGN0004057, FBGN0004654, FBGN00

13772, FBGN0023537, FBGN0030737, FBGN001446
